# Supplementary material for: NDH expression marks major transitions in plant evolution and reveals coordinate intracellular gene loss
Source: PubMed Central journal article supplement (PMC4404220; doi:10.1186/s12870-015-0484-7), 2015-04-11
Supplement: 12870_2015_484_MOESM3_ESM.pdf [file 12870_2015_484_MOESM3_ESM.pdf]

Additional file 3: University of Texas at Austin Plant Resources Center (TEX-LL) voucher information for 26 species of Geraniales.

| Species                            | TEX-LL Voucher # |
|------------------------------------|------------------|
| <i>California macrophylla</i>      | CB G1030         |
| <i>Erodium chrysanthum</i>         | CB G1039         |
| <i>Erodium cheilanthifolium</i>    | Weng G1032       |
| <i>Erodium gruinum</i>             | CB G1042         |
| <i>Erodium texanum</i>             | CB G1018         |
| <i>Erodium trifolium</i>           | Weng G1042       |
| <i>Geranium incanum</i>            | JZ G1001         |
| <i>Geranium maderense</i>          | Weng G1046       |
| <i>Geranium phaeum</i>             | Weng G1036       |
| <i>Hypseocharis bilobata</i>       | Weng G1041       |
| <i>Melianthus villosus</i>         | CB G1032         |
| <i>Monsonia emarginata</i>         | Weng G1033       |
| <i>Monsonia marlothii</i>          | Weng G1075       |
| <i>Pelargonium australe</i>        | Weng G1002       |
| <i>Pelargonium citronellum</i>     | Weng G1006       |
| <i>Pelargonium cotyledonis</i>     | Weng G1004       |
| <i>Pelargonium dichondrifolium</i> | Weng G1010       |

| Species                          | UTPRC Voucher # |
|----------------------------------|-----------------|
| <i>Pelargonium echinatum</i>     | Weng G1018      |
| <i>Pelargonium fulgidum</i>      | Weng G1026      |
| <i>Pelargonium incrassatum</i>   | Weng G1009      |
| <i>Pelargonium myrrhifolium</i>  | CB G1006        |
| <i>Pelargonium nanum</i>         | CB G1015        |
| <i>Pelargonium tetragonum</i>    | Weng G1007      |
| <i>Pelargonium transvalenese</i> | CB G1005        |
| <i>Pelargonium x hortorum</i>    | Weng G1003      |
| <i>Pelargonium exstipulatum</i>  | Weng G1020      |
